# 1            **Estimating spatially variable and density-dependent** 2            **survival using open-population spatial capture-recapture** 3            **models**

4            **Cyril Milleret<sup>1</sup>, Soumen Dey<sup>1</sup>, Pierre Dupont<sup>1</sup>, Daniel Turek<sup>2</sup>, Perry de Valpine<sup>3</sup>,**  
5            **Richard Bischof<sup>2</sup>**

6            <sup>1</sup>Faculty of Environmental Sciences and Natural Resource Management, Norwegian University  
7            of Life Sciences, NO-1432 Ås, Norway

8            <sup>2</sup> Department of Mathematics and Statistics, Williams College, Williamstown, MA 01267,  
9            USA

10           <sup>3</sup> Department of Environmental Science, Policy and Management, University of California  
11           Berkeley, Berkeley, USA

12           **Open Research statement:** code to reproduce the analysis is available on github;

13           <https://github.com/Cyril-Milleret/Public/tree/master/SpatialSurvivalOPSCR>

## 14           **Abstract:**

15           Open-population spatial capture-recapture (OPSCR) models use the spatial information  
16           contained in individual detections collected over multiple consecutive occasions to estimate  
17           occasion-specific density, but also demographic parameters. OPSCR models can also estimate  
18           spatial variation in vital rates, but such models are neither widely used nor thoroughly tested.  
19           We developed a Bayesian OPSCR model that not only accounts for spatial variation in survival  
20           using spatial covariates, but also estimates local density-dependent effects on survival within a  
21           unified framework. Using simulations, we show that OPSCR models provide sound inferences  
22           on the effect of spatial covariates on survival, including multiple competing sources of  
23           mortality, each with potentially different spatial determinants. Estimation of local density-  
24           dependent survival was possible but required more data due to the greater complexity of the  
25           model. Not accounting for spatial heterogeneity in survival led to positive bias in abundance  
26           estimates (up to 10% relative bias). We provide a set of features in R package nimbleSCR that  
27           allow computationally efficient fitting of Bayesian OPSCR models with spatially varying  
28           survival. The ability to make population-level inferences of spatial variation in survival is an

29 essential step towards a fully spatially-explicit OPSCR model that can disentangle the role of  
30 multiple spatial drivers on population dynamics.

## 31 **1. Introduction**

32 Spatial capture recapture (SCR) models are hierarchical models that explicitly use the spatial  
33 information contained in repeated individual detections to account for imperfect detection and  
34 estimate density (Efford 2004, Borchers and Efford 2008, Royle et al. 2014). Because SCR  
35 models are spatially explicit and accommodate various types of data (e.g., physical capture,  
36 photographic, non-invasive genetic, acoustic), they are now routinely used to analyze wildlife  
37 monitoring data. When data are collected over several consecutive occasions, open-population  
38 SCR (OPSCR) models can be used to estimate demographic rates and movement of individuals  
39 between occasions in addition to densities (Bischof et al. 2020a). Modelling individual  
40 movement between occasions can help distinguish between the different causes of individual  
41 disappearances from the population (Gardner et al. 2018). These properties make OPSCR  
42 models well-suited for drawing population-level inferences about the drivers of demographic  
43 processes.

44 Demographic rates, such as survival, are known to vary in time (Gaillard et al. 2000), with  
45 individual attributes (de Valpine et al. 2014), and across space (DeCesare et al. 2014).  
46 Temporal and individual variation of demographic parameters can be readily integrated in  
47 OPSCR models (Augustine et al. 2019, Bischof et al. 2020a), and the possibility of inferring  
48 spatial heterogeneity in survival using OPSCR models has been suggested (Royle et al. 2014)  
49 and applied (Chandler et al. 2018). However, the performance of models that estimate spatially-  
50 variable survival has not been thoroughly tested and their potential remains under-exploited.  
51 Estimation of spatially varying vital rates is a key step in the development of OPSCR models

52 (Royle et al. 2014) as it will lead to a better understanding of the processes driving the spatial  
53 distribution of individuals (Pulliam 1988).

54 At their core, OPSCR models account for imperfect detection by using an observation process  
55 which assumes that an individual's probability of detection is a function of distance from its  
56 activity center (AC) (Borchers and Efford 2008, Royle et al. 2014). The location of individual  
57 ACs is a latent quantity and is a representation of the center of the individual's home range.  
58 AC locations are a key quantity of OPSCR models as they allow the estimation of density and  
59 inter-annual movement. AC locations also provide the spatial information necessary to  
60 characterize the environment in which individuals are located, and therefore its influence on  
61 survival (Chandler et al. 2018).

62 Density itself can be a key driver of survival (Gaillard et al. 2000). The study of density-  
63 dependent survival has often been limited to estimating the average population response to  
64 variation in overall population size through time (Bonenfant et al. 2009). However, variation  
65 in density is a spatiotemporal process and individuals within the population may not experience  
66 the same density. OPSCR models, by estimating spatio-temporal variation in density, offer a  
67 unique opportunity to study density-dependence in survival at the local scale while accounting  
68 for variation and uncertainty in both density and survival within a unified framework.

69 Here, we present a Bayesian OPSCR model that accounts for spatial variation in survival as a  
70 function of spatial covariates (e.g., characteristics of the landscape, resources availability) and  
71 density. We model survival using a hazard rate formulation to allow inferences on spatial  
72 variation in competing risks of mortality (Ergon et al. 2018). We quantify model performance  
73 by simulating OPSCR datasets under a wide range of scenarios. In addition, we quantify the  
74 consequence of ignoring spatial heterogeneity in mortality for OPSCR inferences. All  
75 functionalities are made available in R package nimbleSCR which provides tools for fitting

76 efficient Bayesian (Markov chain Monte Carlo) MCMC models (de Valpine et al. 2017,  
77 NIMBLE Development Team 2019, Bischof et al. 2020b, Turek et al. 2021).

## 78 **2. Methods**

### 79 **2.1. OPSCR model**

80 To estimate spatial variation in mortality from live encounter and dead recoveries collected  
81 over several consecutive occasions (hereafter “years”), we built a Bayesian hierarchical state-  
82 space OPSCR model. The model is composed of four sub-models for 1) density and inter-  
83 annual movement, 2) demography, 3) live detections, and 4) dead recoveries. (Royle et al.  
84 2014, Bischof et al. 2020a, Milleret et al. 2020, 2021, Dupont et al. 2021). We created two  
85 versions of the model. The first version can distinguish between two spatially-variable and  
86 competing causes of mortality. For example, it is possible to distinguish between culling and  
87 other causes of mortality in the case that all individuals culled are recovered dead (Bischof et  
88 al. 2020a). The second model version only considered one cause of mortality. This reflects a  
89 realistic limitation because dead recoveries are not always available in OPSCR datasets and  
90 distinguishing between multiple causes of death may not be possible.

#### 91 **2.1.1. *Spatial distribution and movement submodel***

92 In SCR models, the location of individuals is represented by their activity centers (ACs) within  
93 the spatial domain (S). We used a Bernoulli point process with spatial intensity  $\lambda(\mathbf{s})$  to model  
94 the distribution of ACs, where  $\mathbf{s}$  is a vector of spatial coordinates of ACs (Zhang et al. 2020).  
95 For  $t > 1$ , the probability density of  $\mathbf{s}_{i,t}$  is conditional on the Euclidean distance to  $\mathbf{s}_{i,t-1}$ :

$$96 \quad \lambda(\mathbf{s}_{i,t} | \mathbf{s}_{i,t-1}, \tau) \propto e^{-\frac{\|\mathbf{s}_{i,t} - \mathbf{s}_{i,t-1}\|^2}{2\tau^2}} \quad \text{eqn 1}$$

97 where  $\tau$  is the standard deviation of a bivariate normal distribution centered on  $\mathbf{s}_{i,t-1}$ . This  
98 represents movement between  $t-1$  and  $t$  and helps distinguish between mortality and emigration  
99 (Gardner et al. 2018).

### 100 **2.1.2. Demographic submodel**

101 We used a multistate formulation (Lebreton and Pradel 2002) where each individual life history  
102 is represented by a succession of up to four discrete states  $z_{i,t}$ : 1) “unborn” if the individual has  
103 not been recruited in the population; 2) “alive” if it is alive; 3) “culled” if it was culled and  
104 therefore recovered dead between the start of the previous and current occasion; or 4) “dead”:  
105 if it has died but was not recovered dead. We used data augmentation, whereby additional,  
106 undetected individuals are available for inclusion in the population at each time step (Royle et  
107 al. 2007, Royle and Dorazio 2012).

108 During the first year, individuals can only be designated as “unborn” ( $z_{i,1}=1$ ) or “alive” ( $z_{i,1}=2$ )  
109 so that  $z_{i,1} \sim \text{dcat}(1-\gamma_1, \gamma_1, 0, 0)$  where  $\gamma_1$  represents the probability to be “alive” at time  $t=1$ .

110 For  $t \geq 2$ ,  $z_{i,t}$  is conditional on the state of individual  $i$  at  $t-1$ :

- 111 • If  $z_{i,t-1} = 1$ , individual  $i$  can be recruited (i.e., transition to state 2) with probability  $\gamma_t$ ,  
112 or remain unborn with probability  $1 - \gamma_t$ , so  $z_{i,t} \sim \text{dcat}(1 - \gamma_t, \gamma_t, 0, 0)$ .
- 113 • If  $z_{i,t-1} = 2$ , individual  $i$  can survive with probability  $\phi_i$  and remain  $z_{i,t}=2$ . If it does not  
114 survive, it can either die due to culling and be recovered (transition to  $z_{i,t}=3$ ) with  
115 probability  $h_i$ , or die from other causes without being recovered (transition to  $z_{i,t}=4$ )  
116 with probability  $w_i$ , so that  $z_{i,t} \sim \text{dcat}(0, \phi_i, h_i, w_i)$ , where  $\Phi_i = 1 - h_i - w_i$ .
- 117 • All individuals in dead states ( $z_{i,t-1} = 3$  or 4) transition to  $z_{i,t-1} = 4$ , the absorbing state,  
118 with probability 1, so that  $z_{i,t} \sim \text{dcat}(0, 0, 0, 1)$

119 Abundance estimates are obtained by  $\hat{N}_t = \sum_{i=1}^M I(z_{i,t} = 2)$ , where  $I(z_{i,t} = 2)$  is an indicator  
120 function to count alive individuals, and  $M$  is the number of detected and augmented individuals.

121 **Parameterization with mortality hazard rates** When an individual dies from a specific  
122 cause, it is no longer available to die from another cause. Therefore, mortality causes are  
123 competing and non-independent (Ergon et al. 2018). Following the recommendation of (Ergon  
124 et al. 2018), we parameterized the model using mortality hazard rates instead of mortality  
125 probabilities. We expressed survival and mortality probabilities as functions of the culling  
126 hazard rate ( $m_h$ ) and the hazard rate associated with to all other causes of mortality combined  
127 ( $m_w$ ). For simplicity, we assumed that the hazard rate from culling and other causes remained  
128 proportional within time intervals:

$$129 \quad \phi_i = \exp\left(-\left(m_{h_i} + m_{w_i}\right)\right) \quad \text{eqn 2}$$

$$130 \quad h_i = (1 - \phi_i) \left(\frac{m_{h_i}}{m_{w_i} + m_{w_i}}\right) \quad \text{eqn 3}$$

$$131 \quad w_i = (1 - \phi_i) \left(\frac{m_{w_i}}{m_{h_i} + m_{w_i}}\right) \quad \text{eqn 4}$$

132 **Spatial and individual variation in mortality** We accounted for spatial variation in cause-  
133 specific mortality by modelling mortality hazard rates ( $m_H$  and  $m_W$ ) as functions of a spatial  
134 covariate  $SpatialCov_{s_{i,t}}$  at the location of the AC ( $s_{i,t}$ ):

$$135 \quad \log(m_{H_{i,t}}) = \log(m_{0h}) + \beta_h * SpatialCov_{s_{i,t}} \quad \text{eqn 5}$$

$$136 \quad \log(m_{W_{i,t}}) = \log(m_{0w}) + \beta_w * SpatialCov_{s_{i,t}} \quad \text{eqn 6}$$

137 Where  $\beta_h$  and  $\beta_w$  are the coefficients of the relationship between the spatial covariate on  
138 culling and other mortality, respectively.  $m_{0h}$  and  $m_{0w}$  represent the intercept for culling and  
139 other mortality hazard rate, respectively.

140 **Density dependent survival** At each occasion, local density within any habitat cell  $r$  of  $S$  ( $r$   
141  $= 1, \dots, R$ ) can be obtained as  $d_{r,t} = \sum_{i=1}^M I(s_{i,t} = r, z_{i,t} = 2)$ , where  $I(s_{i,t} = r, z_{i,t} = 2)$  is an  
142 indicator function denoting whether the individual AC falls within cell  $r$  and it is alive.

143 By replacing the *SpatialCov* in Eqn.5-6 with the logarithm of the local density  $\log(d_{s_{i,t,t}})$ , we  
144 can estimate the effect of local density-dependence on individual mortality between occasion  
145 (t-1) and t. Note that since (Eqn 5-6) are on the log scale, transformation of  $d_{r,t}$ , such as  $d_{r,t}' =$   
146  $f(d_{r,t}) = d_{r,t} + 1$ , is necessary to avoid  $\widehat{d_{r,t}} = 0$ .

### 147 **2.1.3. Live detection submodel**

148 We used the half-normal function to model detection probability of individuals alive, whereby  
149 the probability  $p_{i,j,t}$  of detecting individual  $i$  at detector  $j$  and time  $t$  decreases with distance  
150 between the location  $x$  of detector  $j$  and the AC ( $s_{i,t}$ ):

$$151 \quad p_{i,j,t} = p_0 * \exp\left(-\frac{1}{2\sigma^2} \|s_{i,t} - x_j\|^2\right) \quad \text{eqn 7}$$

152 where  $p_0$  is the baseline detection probability, and  $\sigma$  the scale parameter.

153 The detection  $y_{i,j,t}$  of alive individual  $i$  at detector  $j$  and time  $t$ , is modelled as the realization of  
154 a Bernoulli process conditional on both the “alive” individual state (i.e.,  $z_{i,t}=2$ ) and the  
155 individual and detector-specific detection probability  $p_{i,j,t}$ :

$$156 \quad y_{i,j,t} \sim \text{Bernoulli}(p_{i,j,t} * I(z_{i,t} = 2)) \quad \text{eqn 8}$$

### 157 **2.1.4. Dead recovery model**

158 To model dead recoveries within  $S$ , we used a Bernoulli point process with a bivariate normal  
159 density model, where:

$$160 \quad \lambda(y.\text{dead}_{i,t} | s_{i,t}, z_{i,t}, \sigma) \propto e^{-\frac{\|y.\text{dead}_{i,t} - s_{i,t}\|^2}{2\sigma^2}} * I(z_{i,t} = 3). \quad \text{eqn 9}$$

161 where  $y.\text{dead}_{i,t}$  is the vector of spatial coordinates of the dead recovery locations. The indicator  
162 function is used to condition dead recoveries on the individual being culled and recovered dead.  
163 The detection probability function represents space use, we therefore assume that  $\sigma$ , the shape

164 parameter of the detection probability function, is identical for live detections and dead  
165 recoveries.

## 166 **2.2. OPSCR model with a single cause of mortality**

167 To provide an example of the OPSCR model where dead recoveries (*y.dead*) are not available  
168 and cause-specific mortality is not estimable, we built an OPSCR model with only three  
169 demographic states *z*. Individuals could be unborn ( $z_{i,t} = 1$ ), alive ( $z_{i,t} = 2$ ), or dead ( $z_{i,t} =$   
170 3). For  $t > 1$ , alive individuals ( $z_{i,t-1} = 2$ ) can survive with probability  $\phi_{i,t-1}$  and remain  $z_{i,t} =$   
171 2 or die with probability  $(1 - \phi_{i,t-1})$  and transition to  $z_{i,t} = 3$ , the dead absorbing state. We  
172 modelled the effect of density at occasion *t* on individual survival between occasion *t* and *t+1*:

$$173 \log(m_{i,t}) = \log(m_0) + \beta_d * \log(d_{s_{i,t}} + 1) \quad \text{eqn 10}$$

$$174 \phi_{i,t} = 1 - \exp(-m_{i,t}) \quad \text{eqn 11}$$

## 175 **2.3. Simulations**

176 We conducted simulations to quantify the performance of 1) the OPSCR model in estimating  
177 spatial variation in cause-specific mortalities with a deterministic spatial covariate; of 2) the  
178 version of the OPSCR model with integrated density-dependent survival. Finally, we tested the  
179 consequences of ignoring spatial variation in survival for abundance estimates.

### 180 **2.3.1. Using deterministic covariate**

181 We created a spatial domain (*S*) of 28 x 28 distance units (du) subdivided in  $R=49$  cells of 4x4  
182 du. We centered in *S* a 16 x 16 detector grid (with a minimum distance of 1 du between  
183 detectors). This configuration left a 6 du buffer around the detector grid where individuals  
184 cannot be detected alive. We set  $p_0=0.1$ ,  $\sigma=2$ ,  $\tau = 3$  and considered five consecutive occasions.  
185 This set-up led to an average of 2 (95% quantiles=1.5-2.3) detections per individual detected,  
186 and on average 43% (95% quantiles=34%-51%) of individuals alive detected at each occasion



187 (Appendix 1, table 1). We created a spatially autocorrelated covariate following a diagonal  
188 gradient (*SpatialCov*, ranging from (-2 to 2); Figure 1A).

189 We set  $M=650$  and  $N_1=250$  individuals during the first occasion leading to  $\gamma_1 = \frac{N_1}{M} = \frac{250}{650}$ . For  
190  $t>1$ , we assumed a constant 0.3 per capita recruitment rate. We set baseline mortality hazard  
191 rates to  $m_{0_h}=-2.25$  and  $m_{0_w}=-1.75$  and created four different scenarios with all combinations  
192 of  $\beta_h = (1, -1)$  and  $\beta_w = (1, -1)$ .

193 We repeated the simulation scenarios described above, but with 1) lower population size,  
194  $N_1=120$  ( $M=370$ ), and 2) a spatially random covariate  $SpatialCov_r \sim Uniform(-1, 1)$   
195 (Appendix 1, table 1). We expected estimation performance for such scenarios to be more  
196 challenging due to 1) sparser OPSCR data sets (Appendix 1, table 1), and 2) lower level of  
197 spatial autocorrelation and overall variation in mortality. In total, we simulated 100 replicated  
198 OPSCR data sets from each of the 16 scenarios (Appendix 1, table 1). We used NIMBLE's  
199 simulation feature (de Valpine et al. 2017, NIMBLE Development Team 2019) to simulate  
200 OPSCR data sets directly from the nimble OPSCR model (Appendix 4-5).

### 201 **2.3.2. Using density dependent survival**

202 To illustrate how to estimate density-dependent survival, we used the OPSCR model with a  
203 single source of mortality. Preliminary analyses showed that, computationally (convergence,  
204 mixing), OPSCR models performed more poorly when survival was modeled as dependent on  
205 latent density rather than deterministic spatial covariates. covariate. To counter this, we used a  
206 larger spatial domain ( $S$ ) to increase the number of habitat cells ( $R$ ) and thus provide the model  
207 with more variable latent density points to serve as covariate on the mortality hazard rate. This  
208 led to habitat of  $40 \times 40$  distance units (du) subdivided in  $R = 64$  cells of dimension  $5 \times 5$  du and  
209 in which we centered a  $30 \times 30$  detector grid. We set  $M=650$  and  $N_1 = 250$ . We set  $m_0 = 1.6$

210 and  $\beta_d = -1$  to simulate negative density-dependence on survival and simulated 100 replicated  
211 OPSCR data sets (Appendix 1, Table 12).

### 212 **2.3.3. Ignoring spatial heterogeneity in mortality**

213 To evaluate whether ignoring spatial variation in mortality leads to biased parameter estimates,  
214 especially abundance ( $\hat{N}$ ), we fitted all simulated datasets described above with OPSCR models  
215 that assumed constant survival across space and time. As in the earlier simulations, we fitted  
216 models with two competing risks for the deterministic spatial covariate scenarios and a single  
217 cause of mortality for the density dependent scenario.

### 218 **2.4. Model fitting**

219 We fitted the Bayesian OPSCR models using Markov chain Monte Carlo (MCMC) simulation  
220 with NIMBLE in R version 4.1.0 (R Core Team 2021). We used R package nimbleSCR  
221 (Bischof et al. 2020b, Turek et al. 2021) which implements the local evaluation approach  
222 (Milleret et al. 2019) to increase MCMC efficiency. For each simulation, we ran three chains  
223 of 30,000 (60,000 for density-dependent survival) iterations, including a 2000-iteration burn-  
224 in. We considered models as converged when the Gelman-Rubin diagnostic ( $\hat{R}$ , (Gelman and  
225 Rubin 1992)) was  $< 1.1$  for all parameters and by visually inspecting trace plots from a  
226 randomly selected subset of simulations. We also computed the prior-posterior distribution  
227 overlap, and used overlap  $\geq 35\%$  as an indicator of weak identifiability (Gimenez et al. 2009).

### 228 **2.5. Evaluation of model performance**

229 We summarized the posterior  $\hat{\theta}$  for each parameter and each simulation using relative error of  
230 the mean posterior ( $\frac{\bar{\theta}-\theta}{\theta}$ ) and relative precision as the coefficient of variation ( $CV = \frac{SD(\hat{\theta})}{|\bar{\theta}|}$ ),  
231 where  $\theta$  is the true (simulated) parameter value,  $\bar{\theta}$  the mean of the posterior, and  $SD(\hat{\theta})$  the  
232 standard deviation of the posterior. We quantified accuracy of the estimators across many

233 simulations using relative bias of the average of the mean posteriors and the coverage accuracy  
234 of 95% credible intervals. The latter was determined as the rate of correct inferences, which is  
235 the probability that the 95% credible interval of the parameter estimate contains the true value  
236 of that parameter. In addition, we used results from a few of the simulated scenarios with a  
237 deterministic covariate (as described above) to quantify the ability of the model to predict the  
238 spatial pattern in mortality (see further details in Appendix 3).

### 239 **3. Results**

#### 240 **3.1. Spatial heterogeneity using a deterministic spatial covariate**

241 All model parameters converged and were identifiable for scenarios with the spatial gradient  
242 covariate and large population size ( $N_1=250$ ) (Appendix 1, table 2). The combination of the  
243 spatially random covariate and low population size ( $N_1=120$ ) led to the poorest parameter  
244 convergence and identifiability (28-57%; Appendix 1, table 2).

245 All model parameters had low bias ( $\leq 6\%$  relative bias) for all scenarios with large population  
246 size and a gradient covariate (Figure 1, Appendix 1, table 3-6). Accurate estimates were more  
247 challenging to obtain for scenarios with low population size and a spatially-random covariate  
248 (Appendix 1, table 3-6). For example, relative bias of  $\beta_w$  reached 44% for the scenario with  
249 low population size ( $N_1=120$ ), a spatially-random covariate and  $\beta_h = -1$ ;  $\beta_w = 1$ ; (Appendix 1,  
250 table 5). For the same scenario, but with a larger population size ( $N_1=250$ ), relative bias for  $\beta_w$   
251 was substantially lower (RB= 2%). Coverage remained relatively high ( $>90\%$ ) for all scenarios  
252 (Appendix 1, table 3-6). Across all scenarios, the effect of spatial covariates on mortality cause  
253 with no dead recovery information ( $\beta_w$ ) was more challenging to estimate, with lower precision  
254 (approx. 2 times larger CV) than ( $\beta_h$ ) (Fig 1.C, Appendix 1, table 3-6).

#### 255 **3.2. Density-dependent survival**

256 Across the 100 replicated datasets, 86 models reached convergence and showed no  
257 identifiability issues (Appendix 2, table 13). We detected a 13% positive relative bias in  $\phi_0$   
258 and  $\beta_d$  but coverage was >92% for all parameters (Figure 2 A, table 14).

### 259 **3.3. Ignoring spatial heterogeneity in mortality**

260 Apart from not being able to provide robust inferences on mortality, not accounting for spatial  
261 heterogeneity in mortality can lead to bias in abundance estimates. The relative bias (up to 10%  
262 for our simulated scenarios) and lower coverage were especially pronounced for scenarios with  
263 a spatial gradient in mortality (Figure 2 B, Appendix 1, table 7-11).

## 264 **4. Discussion**

265 We described and tested an OPSCR model that explicitly models and estimates spatial variation  
266 in survival. The model is versatile enough to allow survival to be modelled as a function of any  
267 spatial covariate, including local density estimated within the same model. Survival is modeled  
268 as a function of the location of the AC of both detected and undetected individuals which allows  
269 population-level and spatially-explicit inferences. Using simulations, we show that the model  
270 produces sound inferences on the role of spatial covariates and density dependence in  
271 explaining spatial variation in survival. In addition, the model allows for integrating spatial  
272 dead recoveries (Dupont et al. 2021) and estimates multiple competing sources of mortality  
273 with potentially different spatial determinants. The model overcomes a challenge faced by  
274 other methods, namely to obtain population-level assessment of spatial determinants of  
275 variation in survival (Royle et al. 2018).

276 Despite the recognized potential of OPSCR models to estimate spatial variation in vital rates  
277 (Royle et al. 2014), few studies have attempted to use them for this purpose (Chandler et al.  
278 2018)., Furthermore, we are not aware of any study that has evaluated the performance of  
279 OPSCR models that include spatially-explicit vital rates. Our simulations show that sound

280 inferences in the spatial variation of cause-specific mortality can be obtained when survival is  
281 modelled as a function of a deterministic spatial covariate, even with relatively small OPSCR  
282 datasets (5 occasions, ~50 individuals detected per occasion). OPSCR model performance  
283 (convergence, precision) was significantly higher for simulations with spatially autocorrelated  
284 survival (gradient) compared with spatially-random survival (Appendix 1, table 3-6).

285 One of the main advantages of SCR models is that they can estimate spatial variation in density.  
286 We showed that OPSCR models can simultaneously estimate local density and its effect on  
287 survival. This has the advantage that the uncertainty in both the number of individuals alive  
288 and their location is propagated when estimating the spatially link with survival. However,  
289 density being both a latent variable and a covariate used to explain variation in survival, it is  
290 computationally challenging (i.e., due to the increased number of model dependencies) to fit  
291 density dependent-survival OPSCR models. In Appendix 5, we showcase how centering the  
292 density covariate ( $d$ ) can improve the mixing of MCMC chains of different model parameters.

293 Future research should focus on building and testing models that estimate spatial variation in  
294 other demographic parameters, i.e., recruitment, emigration and immigration, as it is an  
295 essential step to fully understand the mechanisms driving spatial heterogeneity in density and  
296 therefore population dynamics (Chandler et al. 2018). Meanwhile, it is possible to use a spatial  
297 covariate on the intensity parameter in the spatial point process submodel for the ACs to help  
298 account for spatial heterogeneity in recruitment (Zhang et al. 2020).

299 The OPSCR model described here can identify spatial variation in mortality and its  
300 determinants from spatial capture-recapture data, which are collected by many monitoring  
301 programs (Royle et al. 2018). Climatic conditions, resources, human activities, hunting,  
302 predation risk, and intra- and inter- specific competition are some examples of the pressures  
303 that are inherently spatial and known to impact survival and that could be studied with the

304 model presented here. We also show that estimates of density obtained from OPSCR models  
305 can be biased (reached up to 10% in the scenarios tested) when spatial variation in survival is  
306 not accounted for. The Bayesian model written in NIMBLE and the set of features available in  
307 the nimbleSCR package will allow users to fit efficient and flexible OPSCR models. This  
308 development represents an essential step towards a fully spatially-explicit OPSCR model that  
309 can disentangle the role of spatial drivers on population dynamics (Chandler et al. 2018).

### 310 **Acknowledgements**

311 Funded by the Norwegian Environment Agency (Miljødirektoratet), the Swedish  
312 Environmental Protection Agency (Naturvårdsverket), and the Research Council of Norway  
313 (NFR 286886). Code to reproduce the analysis are available at: [https://github.com/Cyril-](https://github.com/Cyril-Milleret/Public/tree/master/SpatialSurvivalOPSCR)  
314 [Milleret/Public/tree/master/SpatialSurvivalOPSCR](https://github.com/Cyril-Milleret/Public/tree/master/SpatialSurvivalOPSCR)

### 315 **Author contribution**

316 CM, RB, PD and SD conceived and designed the study. CM implemented the analysis and  
317 wrote the manuscript with contributions from all authors. All authors gave final approval for  
318 publication.

### 319 **References**

320 Augustine, B. C., M. Kéry, J. O. Marin, P. Mollet, G. Pasinelli, and C. Sutherland. 2019. Sex-  
321 specific population dynamics and demography of capercaillie (*Tetrao urogallus* L.) in a  
322 patchy environment. bioRxiv.

323 Bischof, R., C. Milleret, P. Dupont, J. Chipperfield, M. Tourani, A. Ordiz, P. de Valpine, D.  
324 Turek, J. A. Royle, O. Gimenez, Ø. Flagstad, M. Akesson, L. Svensson, H. Brøseth, and  
325 J. Kindberg. 2020a. Estimating and forecasting spatial population dynamics of apex  
326 predators using transnational genetic monitoring. PNAS.

- 327 Bischof, R., D. Turek, C. Milleret, T. Ergon, P. Dupont, and P. de Valpine. 2020b.  
328 nimbleSCR: Spatial Capture-Recapture (SCR) Methods Using “nimble.”
- 329 Bonenfant, C., J.-M. Gaillard, T. Coulson, M. Festa-Bianchet, A. Loison, M. Garel, L. E.  
330 Loe, P. Blanchard, N. Pettorelli, N. Owen-Smith, and others. 2009. Empirical evidence  
331 of density-dependence in populations of large herbivores. *Advances in ecological*  
332 *research* 41:313–357.
- 333 Borchers, D. L., and M. G. Efford. 2008. Spatially Explicit Maximum Likelihood Methods  
334 for Capture-Recapture Studies. *Biometrics* 64:377–385.
- 335 Chandler, R. B., J. Hepinstall-Cymerman, S. Merker, H. Abernathy-Conners, and R. J.  
336 Cooper. 2018. Characterizing spatio-temporal variation in survival and recruitment with  
337 integrated population models. *The Auk* 135:409–426.
- 338 DeCesare, N. J., M. Hebblewhite, M. Bradley, D. Hervieux, L. Neufeld, and M. Musiani.  
339 2014. Linking habitat selection and predation risk to spatial variation in survival. *Journal*  
340 *of Animal Ecology* 83:343–352.
- 341 Dupont, P., C. Milleret, M. Tourani, H. Brøseth, and R. Bischof. 2021. Integrating dead  
342 recoveries in open-population spatial capture-recapture models. *Ecosphere* 12:e03571.
- 343 Efford, M. 2004. Density estimation in live-trapping studies. *Oikos* 106:598–610.
- 344 Ergon, T., Ø. Borgan, C. R. Nater, and Y. Vindenes. 2018. The utility of mortality hazard  
345 rates in population analyses. *Methods in Ecology and Evolution* 9:2046–2056.
- 346 Gaillard, J.-M., M. Festa-Bianchet, N. G. Yoccoz, A. Loison, and C. Toigo. 2000. Temporal  
347 variation in fitness components and population dynamics of large herbivores. *Annual*  
348 *Review of ecology and Systematics* 31:367–393.
- 349 Gardner, B., R. Sollmann, N. S. Kumar, D. Jathanna, and K. U. Karanth. 2018. State space

- 350 and movement specification in open population spatial capture-recapture models.  
351 Ecology and Evolution 0.
- 352 Gelman, A., and D. B. Rubin. 1992. Inference from iterative simulation using multiple  
353 sequences. *Statistical Science* 7:457–511.
- 354 Gimenez, O., B. J. T. Morgan, and S. P. Brooks. 2009. Weak identifiability in models for  
355 mark-recapture-recovery data. Pages 1055–1067 *Modeling demographic processes in*  
356 *marked populations*. Springer.
- 357 Lebreton, J. D., and R. Pradel. 2002. Multistate recapture models: Modelling incomplete  
358 individual histories. *Journal of Applied Statistics* 29:353–369.
- 359 Milleret, C., R. Bischof, P. Dupont, H. Brøseth, J. Odden, and J. Mattisson. 2021. GPS  
360 collars have an apparent positive effect on the survival of a large carnivore. *Biology*  
361 *Letters* 17:20210128.
- 362 Milleret, C., P. Dupont, C. Bonenfant, H. Brøseth, Ø. Flagstad, C. Sutherland, and R.  
363 Bischof. 2019. A local evaluation of the individual state-space to scale up Bayesian  
364 spatial capture–recapture. *Ecology and Evolution* 9:352–363.
- 365 Milleret, C., P. Dupont, J. Chipperfield, D. Turek, H. Brøseth, O. Gimenez, P. de Valpine,  
366 and R. Bischof. 2020. Estimating abundance with interruptions in data collection using  
367 open population spatial capture-recapture models. *Ecosphere* 11:e03172.
- 368 NIMBLE Development Team. 2019. NIMBLE: MCMC, Particle Filtering, and  
369 Programmable Hierarchical Modeling. <https://cran.r-project.org/package=nimble>.
- 370 Pulliam, H. R. 1988. Sources, Sinks, and Population Regulation. *The American Naturalist*  
371 132:652–661.
- 372 R Core Team. 2021. R: A Language and Environment for Statistical Computing. Vienna,



- 373 Austria.
- 374 Royle, J. A., R. B. Chandler, R. Sollmann, and B. Gardner. 2014. *Spatial Capture-Recapture*.  
375 Academic Press.
- 376 Royle, J. A., and R. M. Dorazio. 2012. Parameter-expanded data augmentation for Bayesian  
377 analysis of capture--recapture models. *Journal of Ornithology* 152:521–537.
- 378 Royle, J. A., R. M. Dorazio, and Link W.A. 2007. Analysis of multinomial models with  
379 unknown index using data augmentation. *Journal of Computational and Graphical*  
380 *Statistics* 16(1):67–85.
- 381 Royle, J. A., A. K. Fuller, and C. Sutherland. 2018. Unifying Population and Landscape  
382 Ecology with Spatial Capture-recapture. *Ecography* 41:444–456.
- 383 Turek, D., C. Milleret, T. Ergon, H. Brøseth, P. Dupont, R. Bischof, and P. de Valpine. 2021.  
384 Efficient estimation of large-scale spatial capture-recapture models. *Ecosphere*  
385 12:e03385.
- 386 de Valpine, P., K. Scranton, J. Knap, K. Ram, and N. J. Mills. 2014. The importance of  
387 individual developmental variation in stage-structured population models. *Ecology*  
388 *Letters* 17:1026–1038.
- 389 de Valpine, P., D. Turek, C. J. Paciorek, C. Anderson-Bergman, D. T. Lang, and R. Bodik.  
390 2017. Programming with models: writing statistical algorithms for general model  
391 structures with NIMBLE. *Journal of Computational and Graphical Statistics* 26:403–  
392 413.
- 393 Zhang, W., J. D. Chipperfield, J. B. Illian, P. Dupont, C. Milleret, P. de Valpine, and R.  
394 Bischof. 2020. A hierarchical point process model for spatial capture-recapture data.  
395 bioRxiv.

396 **Figure caption**

397 **Figure 1: A)** Maps depicting the simulated spatial variation in cause-specific mortality ( $h$  and  
398  $w$ ) within the spatial domain ( $S$ ) for the scenario with a gradient covariate  $\beta_h = -1$  and  $\beta_w = 1$   
399 (Table 5 Appendix 1 ). White points represent detectors. Violin plots show the distribution of  
400 the relative error (left; points: relative bias) and coefficient of variation (CV; right, points:  
401 median) in **B)** occasion-specific abundances, and **C)** cause-specific mortality parameters  
402 obtained after fitting the OPSCR model accounting for spatial variation in mortality to 100  
403 replicated datasets. Results from scenarios with small ( $N_I = 120$ ) and large ( $N_I = 250$ ) population  
404 size are presented.

405 **Figure 2: A)** Violin plots (points: medians = relative bias) representing the distribution of the  
406 relative error in occasion-specific abundances ( $\hat{N}$ ) and parameters controlling for the effect of  
407 density in survival ( $\beta_\phi, \phi_0$ ). Abundance estimates and associated relative error were obtained  
408 by fitting an OPSCR model that did not account for spatial variation in survival (“without”) and  
409 a model that accounted for density-dependent survival (“with”) to 100 replicated datasets  
410 simulated with a negative effect of density on survival  $\beta_\phi = -1$ . **B)** Violin plots of distribution  
411 of the relative error (left; points: medians= relative bias) and coverage (right) of occasion-  
412 specific abundances obtained by fitting an OPSCR model that accounted for spatial variation  
413 in mortality (“with) and a model did not (“without”). Results are presented for 100 replicated  
414 datasets simulated with a spatial gradient in mortality,  $\beta_h = -1$ ,  $\beta_w = 1$  and  $N_I = 250$ .

415

416

417

418

419

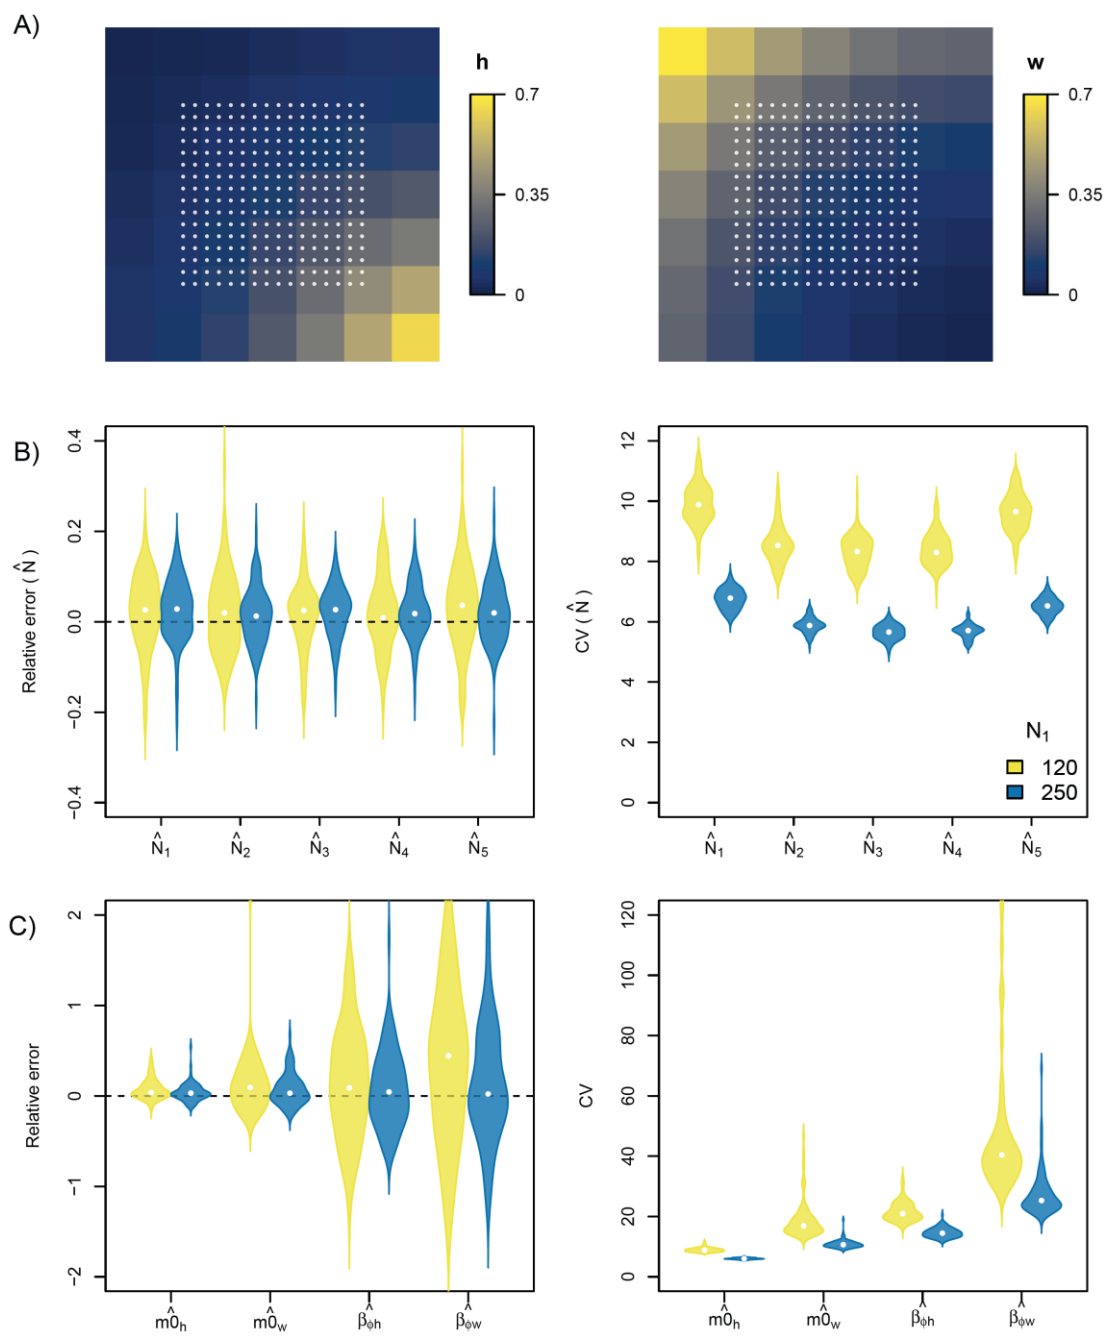

420

421 **Figure 1**

422 **A)**

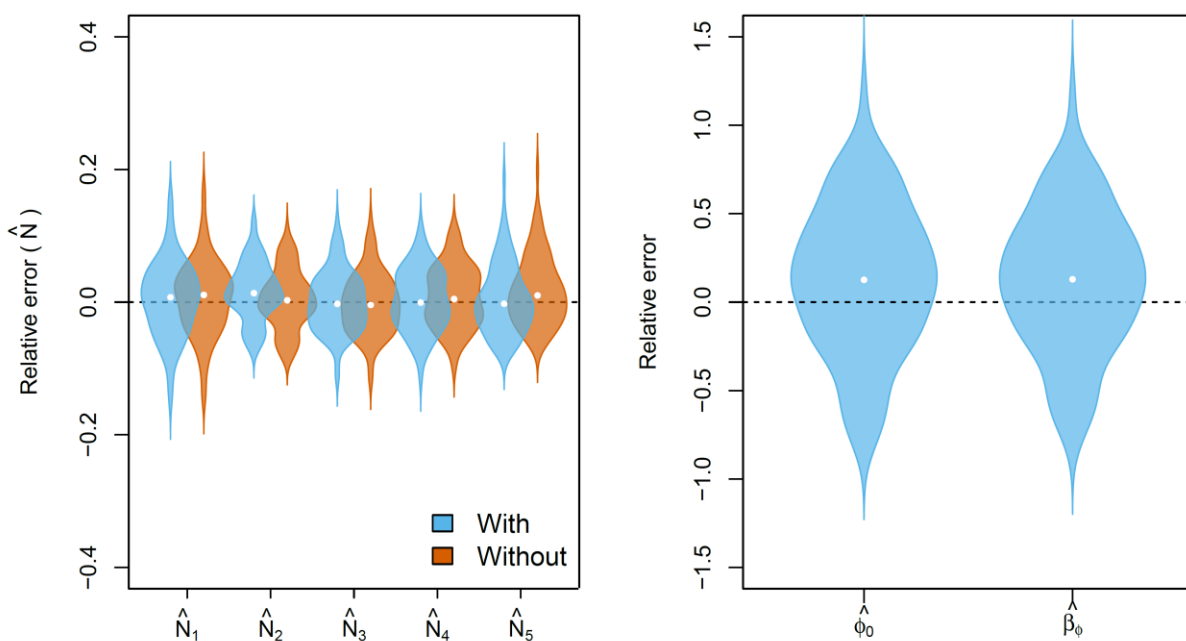

423

424 **B)**

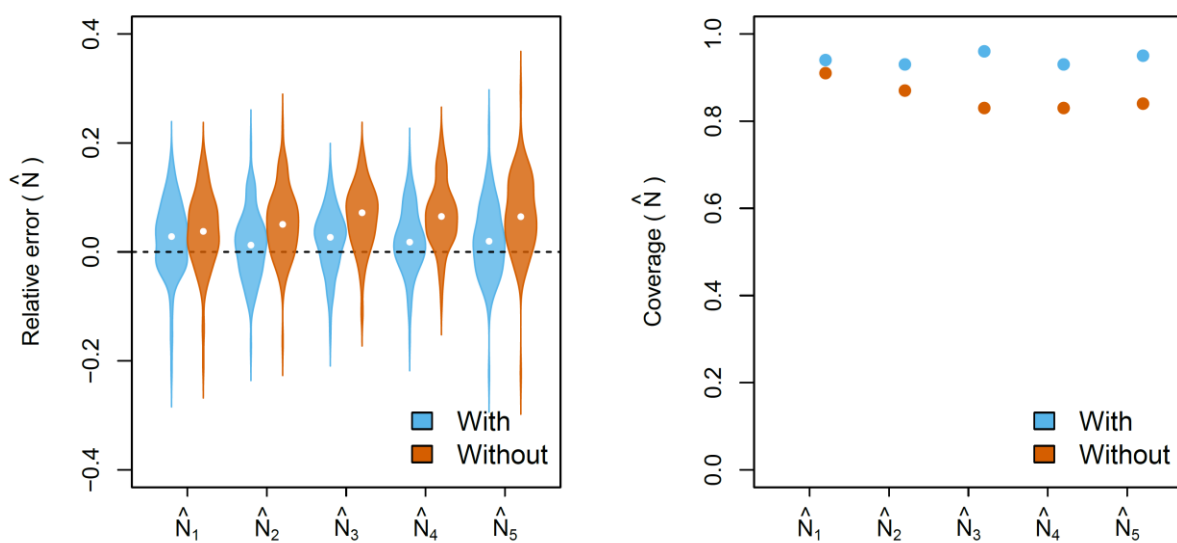

425

426 **Figure 2**

427
